# Supplementary material for: Mobile Apps to Support Healthy Family Food Provision: Systematic Assessment of Popular, Commercially Available Apps
Source: PubMed Central journal article supplement (PMC6320405; doi:10.2196/11867), 2018-12-21
Supplement: mhealth_v6i12e11867_app1.pdf [file mhealth_v6i12e11867_app1.pdf]

Multimedia Appendix 1. Included app details and Mobile App Rating Scale scores

| App name (developer name)                             | Version <sup>a</sup>  | Operating system <sup>b</sup> | App pricing structure (cost <sup>c</sup> in AUD) | Target behaviours |                 |                  |             | MARS score (per MARS domain & overall) <sup>d</sup> |               |            |                     |            |
|-------------------------------------------------------|-----------------------|-------------------------------|--------------------------------------------------|-------------------|-----------------|------------------|-------------|-----------------------------------------------------|---------------|------------|---------------------|------------|
|                                                       |                       |                               |                                                  | Meal planning     | Food purchasing | Meal preparation | Food choice | Engagement                                          | Functionality | Aesthetics | Information quality | MEAN score |
| <b>Recipe and recipe manager apps</b>                 |                       |                               |                                                  |                   |                 |                  |             |                                                     |               |            |                     |            |
| All recipes (Allrecipes.com, Inc)                     | 6.5.2                 | I/A                           | Free                                             |                   | X               | X                |             | 3.0                                                 | 4.0           | 3.7        | 4.0                 | 3.7        |
| Big oven (BigOven.com)                                | 5.6.17 - 5.7.23       | I/A                           | Freemium (subscription)                          |                   | X               | X                |             | 3.0                                                 | 3.8           | 3.7        | 3.5                 | 3.5        |
| Change4Life Smart Recipes (Public Health England)     | 3.0.3                 | I                             | Free                                             | X                 | X               | X                | X           | 3.2                                                 | 4.8           | 4.0        | 3.8                 | 3.9        |
| Cheftap (Mindframe Design, LLC)                       | 4.0.0.415 - 4.0.0.424 | I/A                           | Freemium (subscription)                          |                   |                 | X                |             | 2.6                                                 | 3.3           | 3.3        | 3.5                 | 3.2        |
| Clean and Green Eating (Clean & Green Lifestyle)      | 2.0.2                 | I/A                           | Paid (4.49)                                      |                   | X               | X                |             | 2.8                                                 | 4.8           | 5.0        | 3.0                 | 3.9        |
| Cookbook recipes (Riafy Technologies)                 | 11.16.26              | A                             | Freemium (subscription)                          | X                 | X               | X                | X           | 2.4                                                 | 3.0           | 3.3        | 3.0                 | 2.9        |
| Cookooz (Soft Venture)                                | 1.2                   | I                             | Free                                             | X                 |                 | X                |             | 1.8                                                 | 3.8           | 3.0        | 3.0                 | 2.9        |
| Copy me that (Copy me that)                           | 1.0.0.2 - 3.0.1       | I/A                           | Freemium (subscription)                          | X                 | X               | X                |             | 3.2                                                 | 3.0           | 2.7        | 3.5                 | 3.1        |
| Epicurious (Conde Nast Digital)                       | 6.2.7                 | I                             | Free                                             |                   | X               | X                |             | 3.6                                                 | 4.3           | 4.7        | 3.5                 | 4.0        |
| Jamie Olivers Ultimate Recipes (Zolmo)                | 3.6.1                 | I                             | Paid (10.99)                                     |                   | X               | X                |             | 3.0                                                 | 4.3           | 4.3        | 3.5                 | 3.8        |
| Kitchen stories (Kitchen Stories)                     | 7.2.1A                | I/A                           | Free                                             |                   | X               | X                |             | 3.6                                                 | 4.5           | 5.0        | 3.5                 | 4.2        |
| My cookbook (Maadinfo Services)                       | 5.0.34                | I/A                           | Freemium (subscription)                          |                   | X               | X                |             | 3.2                                                 | 3.8           | 3.7        | 4.0                 | 3.7        |
| My Recipe Book (Cross Forward Consulting, LLC)        | 3.3.4                 | I                             | Paid (0.99)                                      |                   | X               | X                |             | 2.2                                                 | 4.0           | 3.0        | 3.0                 | 3.1        |
| Nigella: The quick Collection (Random House)          | 1.9                   | I                             | Paid (5.99)                                      |                   | X               | X                |             | 2.4                                                 | 3.5           | 3.7        | 3.5                 | 3.3        |
| Paprika (Hindsight Labs LLC)                          | 1.4.2                 | I/A                           | Paid (6.99)                                      | X                 | X               | X                |             | 2.2                                                 | 3.5           | 3.0        | 3.5                 | 3.1        |
| Pepperplate (Pepperplate Inc.)                        | 2.8                   | I/A                           | Free                                             | X                 | X               | X                |             | 1.8                                                 | 3.8           | 2.3        | 3.0                 | 2.7        |
| Recipe book (Recipe Book)                             | 6.0.3.4               | A                             | Freemium (subscription) <sup>e</sup>             |                   | X               | X                |             | 3.4                                                 | 4.0           | 3.7        | 3.5                 | 3.6        |
| RecipeCloud (Jacob Hull)                              | 3.1.6                 | I                             | Freemium (subscription)                          |                   |                 | X                |             | 2.4                                                 | 4.0           | 4.0        | 3.0                 | 3.4        |
| Recipe keeper (Tudorspan)                             | 3.13.3.0 - 3.15.2.0   | I/A                           | Freemium (7.99)                                  | X                 | X               | X                |             | 2.6                                                 | 4.0           | 4.0        | 4.0                 | 3.7        |
| VideoMeals (iCM Development Inc.)                     | 2.2                   | I                             | Paid (4.49)                                      |                   | X               | X                |             | 3.0                                                 | 2.8           | 3.3        | 3.0                 | 3.0        |
| What's for dinner? (Snazzy Software, LLC)             | 2.1                   | I/A                           | Freemium (4.82)                                  | X                 | X               | X                |             | 2.0                                                 | 2.8           | 1.7        | 2.5                 | 2.2        |
| What to cook? (Vitaly Kuz'menko)                      | 2.1                   | I                             | Paid (1.49)                                      | X                 | X               | X                |             | 2.0                                                 | 3.5           | 2.7        | 2.5                 | 2.7        |
| Yummly (Yummly)                                       | 1.9.5.3 - 1.9.6.4     | I/A                           | Free                                             |                   | X               | X                |             | 3.0                                                 | 3.8           | 4.7        | 4.0                 | 3.9        |
| MEAN (SD) MARS score for recipes and recipe managers: |                       |                               |                                                  |                   |                 |                  |             | 2.7(0.6)                                            | 3.8(0.6)      | 3.6(0.8)   | 3.4(0.4)            | 3.4(0.5)   |
| <b>Meal planning apps</b>                             |                       |                               |                                                  |                   |                 |                  |             |                                                     |               |            |                     |            |
| Chef plan (Alberto Gasparin)                          | 1.7.0                 | I/A                           | Paid (1.49)                                      | X                 | X               |                  |             | 1.6                                                 | 4.0           | 3.0        | 2.0                 | 2.7        |
| Hello fresh (Hello Fresh)                             | 2.18.2 - 2.25         | I/A                           | Free <sup>f</sup>                                | X                 | X               | X                |             | 3.4                                                 | 4.3           | 4.7        | 4.0                 | 4.1        |
| Mealime (Mealime Meal Plans Inc)                      | 1.6.6 - 1.7.5         | I/A                           | Freemium (subscription)                          | X                 | X               | X                |             | 4.0                                                 | 4.0           | 4.7        | 4.0                 | 4.2        |
| Meal Planner Pal (Gregg Evans)                        | 2.1                   | I                             | Freemium (1.49)                                  | X                 | X               |                  |             | 1.8                                                 | 2.3           | 1.7        | 2.5                 | 2.1        |
| MealsUp (Benjamin Styles)                             | 1.6.16                | I                             | Freemium (2.99)                                  | X                 | X               | X                |             | 2.6                                                 | 4.0           | 3.7        | 3.5                 | 3.4        |
| Menu Planner (InnovaDev, LLC)                         | 4.05                  | I                             | Paid (4.49)                                      | X                 | X               | X                | X           | 2.2                                                 | 3.3           | 3.0        | 3.0                 | 2.9        |
| My family meal planner (My Family Meal Planner)       | 2.5                   | I/A                           | Paid (4.81)                                      | X                 | X               | X                |             | 1.6                                                 | 4.0           | 2.3        | 3.0                 | 2.7        |
| PlanBuyCook (Appetising Ideas Pty Ltd)                | 2.3.4                 | I                             | Paid (5.99)                                      | X                 | X               | X                |             | 3.4                                                 | 4.8           | 4.0        | 3.5                 | 3.9        |
| Plateful (Happy Accident Apps)                        | 1.4.5 - 1.4.6         | I/A                           | Free                                             | X                 |                 |                  |             | 1.6                                                 | 4.0           | 2.7        | 2.5                 | 2.7        |
| Recipe calendar (Harmonic Soft)                       | 2.10 - 2.20           | I/A                           | Freemium (4.99)                                  | X                 | X               | X                |             | 3.0                                                 | 3.5           | 3.3        | 3.5                 | 3.3        |
| Today's Parent Mealtime (Rogers Media)                | 1.2                   | I/A                           | Free                                             | X                 | X               | X                |             | 3.0                                                 | 4.3           | 3.7        | 3.5                 | 3.6        |
| Week menu (Bjorn Karlsson)                            | 2.3.6                 | I                             | Paid (5.99)                                      | X                 |                 | X                |             | 2.0                                                 | 3.3           | 2.0        | 3.0                 | 2.6        |
| MEAN (SD) MARS score for meal planners:               |                       |                               |                                                  |                   |                 |                  |             | 2.5(0.8)                                            | 3.8(0.7)      | 3.2(1.0)   | 3.2(0.6)            | 3.1(0.7)   |

| App name (developer name)                           | Version <sup>a</sup>     | Operating system <sup>b</sup> | App pricing structure (cost <sup>c</sup> in AUD) | Target behaviours |                 |                  | MARS score (per MARS domain & overall) <sup>d</sup> |            |               |            |                     |            |
|-----------------------------------------------------|--------------------------|-------------------------------|--------------------------------------------------|-------------------|-----------------|------------------|-----------------------------------------------------|------------|---------------|------------|---------------------|------------|
|                                                     |                          |                               |                                                  | Meal planning     | Food purchasing | Meal preparation | Food choice                                         | Engagement | Functionality | Aesthetics | Information quality | MEAN score |
| <b>Shopping list apps</b>                           |                          |                               |                                                  |                   |                 |                  |                                                     |            |               |            |                     |            |
| AnyList (Purple Cover Inc)                          | 5.8                      | I                             | Freemium (subscription)                          |                   | X               |                  |                                                     | 3.0        | 4.3           | 3.7        | 3.5                 | 3.6        |
| Grocery king (Pocket Labs)                          | 2.66 - 2.75 <sup>f</sup> | I/A                           | Freemium (6.99)                                  |                   | X               |                  |                                                     | 2.2        | 2.8           | 3.7        | 3.0                 | 2.9        |
| Grocery List (Dmitry Polevoy)                       | 6.4                      | I                             | Paid (1.99)                                      |                   | X               |                  |                                                     | 1.6        | 1.3           | 2.0        | 1.7                 | 1.6        |
| Grocery tracker (easicorp)                          | 11.22 - 11.34            | A                             | Freemium (6.42)                                  | X                 | X               |                  |                                                     | 1.8        | 2.0           | 2.7        | 3.0                 | 2.4        |
| H-E-B (H-E-B)                                       | 2.4.0                    | I/A                           | Free                                             |                   | X               | X                |                                                     | 2.2        | 4.0           | 3.7        | 3.0                 | 3.2        |
| Lister (Lister Studios)                             | 5.6.20                   | A                             | Free                                             |                   | X               |                  |                                                     | 2.4        | 4.0           | 3.7        | 3.0                 | 3.3        |
| Mighty shopping list (Mighty Pocket)                | 4.0.151                  | A                             | Freemium (3.99)                                  | X                 | X               |                  |                                                     | 1.8        | 2.8           | 2.0        | 3.0                 | 2.4        |
| Out of milk (Out of milk)                           | 8.3.0_816                | I/A                           | Free                                             |                   | X               | X                |                                                     | 2.0        | 3.3           | 3.7        | 3.5                 | 3.1        |
| Scan2List (MidCentury M109edia Inc.)                | 10.6.702                 | I                             | Freemium (subscription)                          |                   | X               |                  |                                                     | 2.0        | 2.8           | 2.3        | 2.5                 | 2.4        |
| Shopping List Ease (inMarket Media, LLC)            | 2.36                     | I                             | Freemium (2.99)                                  |                   | X               |                  |                                                     | 1.8        | 3.3           | 1.7        | 2.5                 | 2.3        |
| MEAN (SD) MARS score for shopping lists:            |                          |                               |                                                  |                   |                 |                  |                                                     | 2.1(0.4)   | 3.0(0.9)      | 2.9(0.9)   | 2.9(0.5)            | 2.7(0.6)   |
| <b>Family organizer apps</b>                        |                          |                               |                                                  |                   |                 |                  |                                                     |            |               |            |                     |            |
| Cozi (Cozi Inc.)                                    | 9.2.5610 - 9.3.5757      | I/A                           | Freemium (subscription)                          | X                 | X               | X                |                                                     | 3.2        | 4.0           | 3.3        | 4.0                 | 3.6        |
| Organizer To-Do (Yadahome.com LLC)                  | 3.10                     | I                             | Freemium (14.99) <sup>g</sup>                    |                   | X               | X                |                                                     | 2.4        | 2.8           | 2.67       | 3.0                 | 2.7        |
| OurHome (OurHome)                                   | 3.13.2                   | I/A                           | Free                                             |                   | X               | X                |                                                     | 4.0        | 4.0           | 4.7        | 4.0                 | 4.2        |
| Picnic (Picnic Labs Inc.)                           | 1.10 - 1.16              | I/A                           | Freemium (subscription)                          |                   | X               | X                |                                                     | 3.0        | 4.0           | 4.0        | 3.5                 | 3.6        |
| MEAN (SD) MARS score for family organizers:         |                          |                               |                                                  |                   |                 |                  |                                                     | 3.2(0.7)   | 3.7(0.6)      | 3.7(0.9)   | 3.6(0.5)            | 3.5(0.6)   |
| <b>Food choice apps</b>                             |                          |                               |                                                  |                   |                 |                  |                                                     |            |               |            |                     |            |
| FoodSwitch (The George Institute for Global Health) | 2.1                      | I/A                           | Free                                             |                   | X               |                  | X                                                   | 3.6        | 4.5           | 3.0        | 4.5                 | 3.9        |
| Perfect produce (SparkPeople)                       | 1.0                      | A                             | Free                                             |                   | X               | X                | X                                                   | 1.8        | 4.3           | 2.7        | 3.5                 | 3.1        |
| MEAN (SD) MARS score for food choice apps:          |                          |                               |                                                  |                   |                 |                  |                                                     | 2.7(1.3)   | 4.4(0.2)      | 2.8(0.2)   | 4.0(0.7)            | 3.5(0.6)   |
| OVERALL MEAN (SD) MARS ratings:                     |                          |                               |                                                  |                   |                 |                  |                                                     | 2.6(0.7)   | 3.6(0.7)      | 3.3(0.9)   | 3.3(0.6)            | 3.2(0.6)   |

a Ranges are included where various versions of apps may have been assessed over the course of the study

b A = available on Android, I = available on iOS

c Cost only included where a paid / premium version was purchased and assessed, and the cost was a one-off payment, as per inclusion criteria

d Range 1-5, 5 indicating a higher quality app

e Payment for ad removal only

f App free to use, with optional meal box kit purchases

g Option to pay by subscription
