# Supplementary material for: Mobile Apps to Support Healthy Family Food Provision: Systematic Assessment of Popular, Commercially Available Apps
Source: PubMed Central journal article supplement (PMC6320405; doi:10.2196/11867), 2018-12-21
Supplement: mhealth_v6i12e11867_app2.pdf [file mhealth_v6i12e11867_app2.pdf]

## Multimedia Appendix 2. App content and features

| App name                              | Primary data direction | BEHAVIORAL SUPPORT CONTENT AND FEATURES |                      |                       |                      |                        |                      |                    |                 |                          |               |                         |                     |                                 |                       | TECHNICAL FEATURES         |                            |                       |                 |                    |                                    |                          |                     |                |                     |                         |               |
|---------------------------------------|------------------------|-----------------------------------------|----------------------|-----------------------|----------------------|------------------------|----------------------|--------------------|-----------------|--------------------------|---------------|-------------------------|---------------------|---------------------------------|-----------------------|----------------------------|----------------------------|-----------------------|-----------------|--------------------|------------------------------------|--------------------------|---------------------|----------------|---------------------|-------------------------|---------------|
|                                       |                        | Food preparation skills instructions    | Food purchasing info | Recipe nutrition info | Produce storage info | Produce nutrition info | Other nutrition info | Recipes            | Recipe managers | Food purchase & delivery | Shopping list | Pantry / fridge manager | Reminders & prompts | Social community / connectivity | Other social supports | Meal planners & meal plans | Encouragement & incentives | User / family profile | Personalisation | Practical features | Miscellaneous & optional purchases | Search & display options | Other input options | Requires login | Web access required | Syncing between devices | Cloud back-up |
| <b>Recipe and recipe manager apps</b> |                        |                                         |                      |                       |                      |                        |                      |                    |                 |                          |               |                         |                     |                                 |                       |                            |                            |                       |                 |                    |                                    |                          |                     |                |                     |                         |               |
| All recipes                           | Input & output         | X                                       | X                    |                       |                      |                        | X                    |                    | X(a)            |                          | X             | X                       | X                   |                                 |                       | X                          | X                          | X                     | X               |                    | X                                  |                          |                     | X              | X                   | X                       |               |
| Big oven                              | Input & output         |                                         |                      |                       |                      |                        | X                    | X(a)               | X(a)            |                          | X             | X                       | X                   |                                 |                       | X                          | X                          |                       |                 |                    | X                                  | X                        |                     | X              | X                   | X                       |               |
| Change4Life Smart Recipes             | Output                 | X                                       | X                    |                       |                      | X                      | X                    |                    | X(a)            |                          |               |                         | X                   | X                               |                       | X                          |                            | X                     |                 |                    | X                                  |                          |                     | X <sup>b</sup> |                     |                         |               |
| Cheftap                               | Input                  |                                         |                      |                       |                      |                        | X                    | X(a)               |                 |                          |               |                         | X                   |                                 |                       |                            |                            | X                     | X               |                    | X                                  |                          | X <sup>c</sup>      | X              | X                   | X                       |               |
| Clean and Green Eating Cookbook       | Output                 |                                         |                      | X                     |                      |                        | X                    |                    | X(a)            |                          |               |                         | X                   |                                 |                       | X                          |                            | X                     |                 | X                  |                                    |                          |                     | X <sup>b</sup> |                     |                         |               |
| recipes                               | Input & output         |                                         |                      |                       |                      | X                      | X                    | X(a)               | X(a)            |                          | X             | X                       | X                   | X                               |                       | X                          | X                          | X                     |                 |                    | X                                  |                          | X                   | X              | X                   |                         |               |
| Cookooz                               | Input                  |                                         |                      |                       |                      |                        | X                    | X(m)               |                 |                          |               |                         | X                   |                                 |                       |                            |                            | X                     |                 |                    |                                    | X                        | X                   | X <sup>b</sup> |                     | X                       |               |
| Copy me that                          | Input & output         |                                         |                      |                       |                      |                        | X                    | X(a)               | X(a)            |                          |               | X                       | X                   | X                               | X                     |                            | X                          |                       | X               | X                  | X                                  |                          | X                   | X              | X                   | X                       |               |
| Epicurious                            | Output                 | X                                       |                      |                       |                      |                        | X                    |                    | X(a)            |                          | X             |                         | X                   | X                               |                       | X                          |                            | X                     | X               | X                  | X                                  |                          | X                   | X              | X                   | X                       |               |
| Jamie Olivers Ultimate Recipes        | Output                 | X                                       |                      |                       |                      |                        | X                    |                    | X(a)            |                          |               |                         | X                   | X                               |                       | X                          |                            | X                     | X               | X                  | X                                  |                          | X                   | X              | X                   | X                       |               |
| Kitchen stories                       | Output                 | X                                       | X                    | X                     | X                    |                        | X                    |                    | X(a)            |                          |               | X                       | X                   | X                               | X                     | X                          |                            | X                     | X               | X                  |                                    |                          | X                   | X              | X                   | X                       |               |
| My cookbook                           | Input                  |                                         |                      |                       |                      |                        |                      | X(a)               | X(a)            |                          |               | X                       | X                   | X                               |                       |                            |                            | X                     | X               | X                  |                                    | X                        | X                   | X              | X                   | X                       |               |
| My Recipe Book                        | Input                  |                                         |                      |                       |                      |                        | X                    | X(a)               | X(a)            |                          |               |                         | X                   | X                               |                       |                            |                            | X                     | X               | X                  |                                    | X                        | X <sup>b</sup>      | X              | X                   | X                       |               |
| Nigella: The quick Collection         | Output                 | X                                       |                      |                       |                      |                        | X                    |                    | X(a)            |                          |               |                         | X                   | X                               |                       |                            |                            | X                     | X               | X                  |                                    | X                        |                     |                |                     |                         |               |
| Paprika                               | Input                  |                                         |                      |                       |                      |                        |                      |                    | X(a)            |                          |               |                         | X                   | X                               | X                     |                            |                            | X                     | X               | X                  |                                    | X                        |                     | X <sup>b</sup> | X                   | X                       |               |
| Pepperplate                           | Input                  |                                         |                      |                       |                      |                        |                      | X(m <sup>d</sup> ) | X(a)            |                          |               |                         | X                   | X                               | X                     |                            |                            | X                     | X               | X                  |                                    | X                        |                     | X <sup>b</sup> | X                   | X                       |               |
| Recipe book                           | Input & output         |                                         |                      | X                     |                      |                        | X                    | X(m)               | X(a)            |                          |               | X                       | X                   |                                 |                       | X                          | X                          | X                     | X               | X                  |                                    | X                        |                     | X              | X                   | X                       |               |
| RecipeCloud                           | Input & output         |                                         |                      |                       |                      |                        | X                    | X(a)               | X(a)            |                          |               | X                       | X                   |                                 |                       | X                          | X                          | X                     | X               | X                  |                                    | X                        |                     | X              | X                   | X                       |               |
| Recipe keeper                         | Input                  |                                         |                      |                       |                      |                        | X                    | X(a)               | X(a)            |                          |               |                         | X                   | X                               | X                     |                            |                            | X                     |                 | X                  |                                    | X                        |                     | X              | X                   | X                       |               |
| VideoMeals                            | Output                 |                                         |                      |                       |                      |                        | X                    |                    | X(a)            |                          |               | X                       | X                   | X                               |                       |                            |                            | X                     | X               | X                  |                                    | X                        |                     |                | X                   | X                       |               |
| What's for dinner?                    | Input                  |                                         |                      |                       |                      |                        | X                    | X(m)               | X(a)            |                          |               |                         | X                   | X                               |                       |                            |                            |                       | X               |                    |                                    |                          |                     | X <sup>b</sup> | X                   | X                       |               |
| What to cook?                         | Input                  |                                         |                      |                       |                      |                        |                      | X(a <sup>e</sup> ) | X(a)            | X(a)                     |               |                         | X                   | X                               |                       |                            |                            |                       | X               |                    | X                                  |                          |                     | X <sup>b</sup> | X                   | X                       |               |
| Yummly                                | Input & output         |                                         |                      | X                     |                      |                        | X                    |                    | X(a)            | X                        |               | X                       | X                   |                                 |                       | X                          | X                          |                       | X               |                    | X                                  |                          | X                   | X              | X                   | X                       |               |
| TOTAL                                 |                        | 6                                       | 0                    | 6                     | 1                    | 1                      | 2                    | 19                 | 13              | 1                        | 20            | 1                       | 4                   | 10                              | 23                    | 10                         | 8                          | 7                     | 20              | 17                 | 4                                  | 19                       | 6                   | 12             | 21                  | 12                      | 14            |
| <b>Meal planning apps</b>             |                        |                                         |                      |                       |                      |                        |                      |                    |                 |                          |               |                         |                     |                                 |                       |                            |                            |                       |                 |                    |                                    |                          |                     |                |                     |                         |               |
| Chef plan                             | Input                  |                                         |                      |                       |                      |                        |                      |                    |                 |                          | X(m)          |                         |                     | X                               | X                     |                            |                            |                       |                 |                    |                                    |                          | X                   |                | X <sup>b</sup>      |                         |               |
| Hello fresh                           | Output                 |                                         |                      | X                     |                      |                        | X                    | X                  |                 | X                        |               |                         | X                   | X                               | X                     | X                          | X                          | X                     | X               |                    |                                    |                          | X                   | X              | X                   | X                       |               |
| Mealime                               | Input & output         |                                         |                      |                       |                      |                        | X                    |                    | X(a)            |                          |               |                         |                     | X                               | X                     | X                          | X                          | X                     | X               |                    | X                                  |                          | X                   | X              | X                   | X                       |               |

|                              |                        | BEHAVIORAL SUPPORT CONTENT AND FEATURES |                      |                       |                      |                        |                      |         |                    |                          |               |                         |                     |                                 |                       | TECHNICAL FEATURES         |                            |                       |                 |                    |                                    |                          |                     |                |                     |                         |               |   |   |
|------------------------------|------------------------|-----------------------------------------|----------------------|-----------------------|----------------------|------------------------|----------------------|---------|--------------------|--------------------------|---------------|-------------------------|---------------------|---------------------------------|-----------------------|----------------------------|----------------------------|-----------------------|-----------------|--------------------|------------------------------------|--------------------------|---------------------|----------------|---------------------|-------------------------|---------------|---|---|
| App name                     | Primary data direction | Food preparation skills instructions    | Food purchasing info | Recipe nutrition info | Produce storage info | Produce nutrition info | Other nutrition info | Recipes | Recipe managers    | Food purchase & delivery | Shopping list | Pantry / fridge manager | Reminders & prompts | Social community / connectivity | Other social supports | Meal planners & meal plans | Encouragement & incentives | User / family profile | Personalisation | Practical features | Miscellaneous & optional purchases | Search & display options | Other input options | Requires login | Web access required | Syncing between devices | Cloud back-up |   |   |
| Meal Planner Pal             | Input                  |                                         |                      |                       |                      |                        |                      |         |                    |                          | X(a)          | X                       |                     | X                               | X                     |                            |                            |                       |                 |                    | X                                  |                          | X                   |                | X <sup>b</sup>      |                         |               |   |   |
| MealsUp                      | Input                  |                                         |                      |                       |                      |                        |                      |         | X(m)               |                          | X(a)          | X                       |                     | X                               | X                     |                            |                            |                       |                 |                    |                                    | X                        | X                   | X              | X                   | X                       | X             | X |   |
| Menu Planner                 | Input                  |                                         |                      |                       |                      | X                      |                      |         | X(a)               |                          | X(a)          | X(m)                    |                     | X                               | X                     | X                          |                            |                       | X               | X                  |                                    |                          | X                   | X              | X                   | X <sup>b</sup>          | X             | X |   |
| My family meal planner       | Output                 |                                         |                      | X                     |                      |                        |                      | X       |                    |                          | X(a)          |                         |                     | X                               | X                     |                            |                            |                       | X               |                    |                                    |                          |                     |                |                     |                         |               |   |   |
| PlanBuyCook                  | Input & output         | X                                       |                      |                       |                      |                        |                      | X       | X(m)               |                          | X(a)          |                         |                     | X                               | X                     |                            |                            |                       | X               | X                  | X                                  | X                        | X                   |                |                     |                         |               | X |   |
| Plateful                     | Input                  |                                         |                      |                       |                      |                        |                      |         | X(m)               |                          |               |                         | X                   |                                 | X                     |                            |                            |                       | X               |                    |                                    |                          |                     |                |                     | X                       |               |   |   |
| Recipe calendar              | Input & output         |                                         |                      | X                     |                      |                        |                      | X       |                    |                          | X(a)          |                         | X                   | X                               | X                     |                            |                            | X                     | X               | X                  |                                    |                          |                     | X              | X                   | X                       | X             | X |   |
| Today's Parent Mealtime      | Output                 |                                         |                      |                       |                      |                        |                      | X       | X(m)               |                          | X(a)          |                         |                     | X                               | X                     | X                          |                            |                       | X               |                    |                                    |                          |                     | X              | X                   | X                       |               | X |   |
| Week menu                    | Input                  |                                         |                      |                       |                      |                        |                      |         | X(m)               |                          |               |                         |                     | X                               | X                     |                            |                            |                       | X               |                    |                                    | X                        | X                   |                | X                   | X                       | X             | X |   |
| TOTAL                        |                        | 1                                       | 0                    | 3                     | 0                    | 1                      | 1                    | 6       | 6                  | 1                        | 9             | 1                       | 4                   | 4                               | 11                    | 12                         | 1                          | 3                     | 9               | 4                  | 2                                  | 5                        | 6                   | 6              | 10                  | 6                       | 6             | 6 |   |
| <b>Shopping list apps</b>    |                        |                                         |                      |                       |                      |                        |                      |         |                    |                          |               |                         |                     |                                 |                       |                            |                            |                       |                 |                    |                                    |                          |                     |                |                     |                         |               |   |   |
| AnyList                      | Input                  |                                         |                      |                       |                      |                        |                      | X       | X(a)               |                          | X(a)          |                         | X                   |                                 | X                     |                            |                            |                       | X               | X                  |                                    |                          | X                   | X              | X                   | X                       | X             | X | X |
| Grocery king                 | Input                  |                                         |                      |                       |                      |                        |                      |         | X(m)               |                          | X(a)          | X(a)                    | X                   |                                 | X                     |                            |                            |                       |                 | X                  |                                    |                          | X                   | X              | X                   | X <sup>b</sup>          | X             | X |   |
| Grocery List                 | Input                  |                                         |                      |                       |                      | X                      |                      |         |                    |                          | X(m)          | X(m)                    |                     |                                 |                       |                            |                            |                       |                 |                    |                                    |                          | X                   | X              |                     |                         |               |   |   |
| Grocery tracker              | Input                  |                                         |                      |                       |                      |                        |                      |         |                    |                          | X(m)          | X(m)                    |                     |                                 | X                     | X                          |                            |                       |                 |                    |                                    |                          | X                   | X              |                     |                         | X             |   |   |
| H-E-B                        | Input & output         |                                         |                      | X                     |                      |                        |                      | X       |                    | X <sup>f</sup>           | X(a)          |                         |                     | X                               | X                     | X                          | X                          | X                     | X               | X                  | X                                  | X                        | X                   | X              | X                   | X                       | X             | X |   |
| Lister                       | Input                  |                                         |                      |                       |                      |                        |                      |         | X(m)               |                          | X(a)          |                         | X                   |                                 | X                     |                            | X                          |                       |                 | X                  |                                    |                          | X                   |                |                     |                         | X             | X |   |
| Mighty shopping list         | Input                  |                                         |                      |                       |                      |                        |                      |         | X(m)               |                          | X(a)          | X(a)                    |                     |                                 | X                     | X                          |                            |                       |                 | X                  | X                                  | X                        |                     | X              | X                   |                         |               |   |   |
| Out of milk                  | Input & output         |                                         |                      |                       |                      |                        |                      | X       | X(a <sup>e</sup> ) |                          | X(a)          | X(m)                    |                     |                                 | X                     |                            | X                          |                       | X               | X                  | X                                  | X                        | X                   | X              | X                   | X                       | X             | X |   |
| Scan2List                    | Input                  |                                         |                      |                       |                      |                        |                      | X       | X(m)               |                          | X(m)          |                         | X                   |                                 | X                     |                            |                            |                       | X               |                    | X                                  | X                        | X                   | X <sup>b</sup> | X                   | X                       | X             | X |   |
| Shopping List Ease           | Input                  |                                         |                      |                       |                      |                        |                      |         | X(m)               |                          | X(m)          |                         | X                   |                                 | X                     |                            | X                          |                       |                 | X                  | X                                  | X                        | X                   | X <sup>b</sup> |                     |                         | X             | X |   |
| TOTAL                        |                        | 0                                       | 0                    | 1                     | 0                    | 1                      | 0                    | 4       | 7                  | 1                        | 10            | 5                       | 5                   | 0                               | 9                     | 2                          | 4                          | 0                     | 4               | 7                  | 5                                  | 8                        | 10                  | 7              | 5                   | 8                       | 8             | 7 |   |
| <b>Family organizer apps</b> |                        |                                         |                      |                       |                      |                        |                      |         |                    |                          |               |                         |                     |                                 |                       |                            |                            |                       |                 |                    |                                    |                          |                     |                |                     |                         |               |   |   |
| Cozi                         | Input                  |                                         |                      |                       |                      |                        |                      | X       | X(a)               |                          | X(a)          |                         |                     |                                 | X                     | X                          |                            | X                     |                 | X                  | X                                  | X                        | X                   | X              | X <sup>b</sup>      | X                       | X             | X |   |
| Organizer To-Do              | Input                  |                                         |                      |                       |                      |                        |                      | X       |                    |                          | X(a)          |                         |                     |                                 | X                     | X                          |                            | X                     |                 | X                  |                                    | X                        | X                   |                | X <sup>b</sup>      | X                       |               |   |   |
| OurHome                      | Input                  |                                         |                      |                       |                      |                        |                      |         |                    |                          | X(a)          |                         | X                   |                                 | X                     |                            | X                          | X                     |                 |                    |                                    | X                        | X                   | X              | X                   | X                       | X             | X |   |
| Picnic                       | Input & output         |                                         |                      |                       |                      |                        |                      | X       | X(a <sup>e</sup> ) |                          | X(a)          |                         |                     |                                 | X                     |                            | X                          | X                     |                 |                    |                                    | X                        |                     | X              | X <sup>b</sup>      | X                       | X             | X |   |
| TOTAL                        |                        | 0                                       | 0                    | 0                     | 0                    | 0                      | 0                    | 3       | 2                  | 0                        | 4             | 0                       | 1                   | 0                               | 4                     | 2                          | 2                          | 3                     | 1               | 1                  | 2                                  | 4                        | 3                   | 3              | 4                   | 4                       | 4             | 3 |   |
| <b>Food choice apps</b>      |                        |                                         |                      |                       |                      |                        |                      |         |                    |                          |               |                         |                     |                                 |                       |                            |                            |                       |                 |                    |                                    |                          |                     |                |                     |                         |               |   |   |
| FoodSwitch                   | Output                 |                                         |                      |                       |                      | X                      |                      |         |                    |                          | X(m)          |                         |                     |                                 | X                     |                            |                            |                       |                 |                    |                                    |                          | X                   | X              |                     | X <sup>b</sup>          |               |   |   |
| Perfect produce              | Output                 |                                         | X                    |                       | X                    | X                      |                      | X       |                    |                          |               |                         |                     |                                 |                       |                            |                            |                       | X               |                    |                                    |                          |                     |                |                     | X                       |               |   |   |
| TOTAL                        |                        | 0                                       | 1                    | 0                     | 1                    | 2                      | 0                    | 1       | 0                  | 0                        | 1             | 0                       | 0                   | 1                               | 0                     | 0                          | 0                          | 0                     | 1               | 0                  | 0                                  | 1                        | 1                   | 0              | 2                   | 0                       | 0             | 0 |   |

(a) = autopopulated e.g. recipe content clipped from the web, ingredients from recipes sent to shopping list; (m) = manual data input by text, image, barcode

a No apps addressed automatic motivation

b Required for emailing, sharing, syncing and/or cloud back-up only

c Only allows up to 15 recipes without login, 100 with login

d Can be imported via online content but only via website (manual entry only in app)

e Recipes not imported – weblink saved and recipe viewed via internal browser

f Ordering can only occur via website, but is linked to groceries selected within the app

**Reminders & prompts** = Recipe suggestions on entering the supermarket, supermarket proximity alert, reminders (to cook, plan meals, shop)

**Social community / connectivity** = Community (with following), upload recipes/images, rate, review, like, comment

**Other social supports** = Sharing to social media, sending via email, shared calendar, private messaging

**Encouragement & incentives** = Positive messages, points, rewards, competitions, sales/discounts, other notifications (e.g. new content, offers)

**User / family profile** = Individual profile or profile of individual family members / family as a whole

**Personalization** = Food preferences, dietary requirements, favourites, try or make lists, scale recipes to serves required, add notes or rating to recipes (private)

**Practical features** = Prevents device from sleeping, voice command, audio reading, hands free, smart watch compatible, cooking timers, unit conversions

**Miscellaneous & optional purchases** = To-do lists, optional purchases (e.g. hard copy cookbook, cooking equipment)

**Search & display options** = Search functions e.g. by ingredient, recipe name, category, novel search functions e.g. by shaking device, by photo

**Other input options** = common items lists, history/recurring items, barcode scanners, add images, coupons, loyalty cards
