# Supplementary material for: Mobile Apps to Support Healthy Family Food Provision: Systematic Assessment of Popular, Commercially Available Apps
Source: PubMed Central journal article supplement (PMC6320405; doi:10.2196/11867), 2018-12-21
Supplement: mhealth_v6i12e11867_app3.pdf [file mhealth_v6i12e11867_app3.pdf]

Multimedia Appendix 3. Behavior change technique presence within apps, according to the behavior change technique taxonomy version 1

| App name                                                            | BEHAVIOR CHANGE TECHNIQUE |                     |                           |                             |                           |                                |                            |                                 |                          |                           |                       |                  |                        |                               | No. of BCTs per app |                            |                          |                             |                               |
|---------------------------------------------------------------------|---------------------------|---------------------|---------------------------|-----------------------------|---------------------------|--------------------------------|----------------------------|---------------------------------|--------------------------|---------------------------|-----------------------|------------------|------------------------|-------------------------------|---------------------|----------------------------|--------------------------|-----------------------------|-------------------------------|
|                                                                     | 1.1 Goal setting (behav)  | 1.4 Action planning | 2.3 Self-mon of behaviour | 3.1 Social support (unspec) | 3.2 Social support (prac) | 4.1 Instr on how perform behav | 5.1 Info about health cons | 5.3 Info about soc & envir cons | 5.6 Info about emot cons | 6.1 Demo of the behaviour | 6.2 Social comparison | 7.1 Prompts/cues | 8.2 Behav substitution | 10.1 Material incentive behav |                     | 10.2 Material reward behav | 10.3 Non-specific reward | 10.6 Non-specific incentive | 12.5 Add objects to the envir |
| <b>Recipe and recipe manager apps</b>                               |                           |                     |                           |                             |                           |                                |                            |                                 |                          |                           |                       |                  |                        |                               |                     |                            |                          |                             |                               |
| All recipes                                                         |                           |                     |                           | X                           | X                         |                                |                            |                                 | X                        |                           | X                     |                  | X                      |                               | X                   |                            | X                        |                             | 7                             |
| Big oven                                                            | X                         |                     |                           | X                           | X                         |                                |                            |                                 |                          |                           |                       |                  |                        |                               |                     |                            | X                        |                             | 4                             |
| Change4Life Smart Recipes                                           |                           |                     | X                         |                             | X                         | X                              | X                          |                                 | X                        |                           |                       |                  |                        |                               |                     |                            | X                        |                             | 6                             |
| Cheftap                                                             | X                         |                     | X                         |                             | X                         |                                | X                          |                                 |                          |                           |                       |                  |                        |                               |                     |                            | X                        |                             | 5                             |
| Clean and Green Eating                                              |                           |                     |                           |                             | X                         |                                |                            |                                 |                          |                           |                       |                  |                        |                               |                     |                            | X                        |                             | 2                             |
| Cookbook recipes                                                    | X                         | X                   |                           |                             | X                         | X                              |                            |                                 | X                        |                           | X                     |                  |                        |                               |                     |                            | X                        |                             | 7                             |
| Cookooz                                                             | X                         | X                   |                           |                             | X                         |                                |                            |                                 |                          |                           |                       |                  |                        |                               |                     |                            | X                        |                             | 4                             |
| Copy me that                                                        | X                         | X                   |                           | X                           | X                         |                                |                            |                                 |                          |                           |                       |                  |                        |                               |                     |                            | X                        |                             | 5                             |
| Epicurious                                                          |                           |                     |                           |                             | X                         |                                |                            |                                 | X                        | X                         | X                     |                  |                        |                               |                     |                            | X                        |                             | 5                             |
| Jamie Olivers Ultimate Recipes                                      |                           |                     |                           |                             | X                         |                                |                            |                                 | X                        |                           |                       |                  |                        |                               |                     |                            | X                        |                             | 3                             |
| Kitchen stories                                                     |                           |                     |                           |                             | X                         |                                |                            |                                 | X                        | X                         |                       |                  |                        |                               |                     |                            | X                        |                             | 4                             |
| My cookbook                                                         |                           |                     |                           |                             |                           |                                |                            |                                 |                          |                           |                       |                  |                        |                               |                     |                            | X                        |                             | 1                             |
| My Recipe Book                                                      |                           |                     |                           |                             | X                         |                                |                            |                                 |                          |                           |                       |                  |                        |                               |                     |                            | X                        |                             | 2                             |
| Nigella: The quick Collection                                       |                           |                     |                           |                             | X                         |                                |                            |                                 | X                        |                           |                       |                  |                        |                               |                     |                            | X                        |                             | 3                             |
| Paprika                                                             | X                         | X                   |                           |                             |                           |                                |                            |                                 |                          |                           |                       |                  |                        |                               |                     |                            | X                        |                             | 3                             |
| Pepperplate                                                         | X                         | X                   |                           |                             |                           |                                |                            |                                 |                          |                           |                       |                  |                        |                               |                     |                            | X                        |                             | 3                             |
| Recipe book                                                         |                           |                     |                           | X                           | X                         |                                |                            |                                 | X                        |                           |                       |                  |                        |                               |                     |                            | X                        |                             | 4                             |
| RecipeCloud                                                         |                           |                     |                           | X                           | X                         |                                |                            |                                 |                          |                           |                       |                  |                        |                               |                     |                            | X                        |                             | 3                             |
| Recipe keeper                                                       | X                         | X                   |                           |                             | X                         |                                |                            |                                 |                          |                           |                       |                  |                        |                               |                     |                            | X                        |                             | 4                             |
| VideoMeals                                                          | X                         | X                   |                           |                             | X                         |                                |                            |                                 | X                        |                           |                       |                  |                        |                               |                     |                            | X                        |                             | 5                             |
| What's for dinner?                                                  | X                         | X                   |                           |                             | X                         |                                |                            |                                 |                          |                           |                       |                  |                        |                               |                     |                            | X                        |                             | 4                             |
| What to cook?                                                       | X                         | X                   |                           |                             |                           |                                |                            |                                 |                          |                           |                       |                  |                        |                               |                     |                            | X                        |                             | 3                             |
| Yummly                                                              |                           |                     |                           |                             | X                         |                                |                            |                                 | X                        |                           |                       |                  |                        |                               |                     |                            | X                        |                             | 3                             |
| Mean (SD) no. of BCTs identified in recipe and recipe manager apps: |                           |                     |                           |                             |                           |                                |                            |                                 |                          |                           |                       |                  |                        |                               |                     |                            |                          |                             | 3.9 (1.5)                     |
| <b>Meal planning apps</b>                                           |                           |                     |                           |                             |                           |                                |                            |                                 |                          |                           |                       |                  |                        |                               |                     |                            |                          |                             |                               |
| Chef plan                                                           | X                         | X                   |                           |                             |                           |                                | X                          |                                 |                          |                           |                       |                  |                        |                               |                     |                            | X                        |                             | 4                             |
| Hello fresh                                                         | X                         | X                   |                           |                             | X                         |                                | X                          | X                               | X                        | X                         |                       |                  | X                      | X                             |                     |                            | X                        |                             | 9                             |
| Mealime                                                             | X                         |                     | X                         | X                           | X                         |                                | X                          | X                               |                          |                           |                       |                  |                        |                               |                     |                            | X                        |                             | 7                             |
| Meal Planner Pal                                                    | X                         | X                   |                           |                             |                           |                                |                            |                                 |                          |                           | X                     |                  |                        |                               |                     |                            | X                        |                             | 4                             |
| MealsUp                                                             | X                         | X                   |                           |                             |                           |                                | X                          |                                 |                          |                           | X                     |                  |                        |                               |                     |                            | X                        |                             | 5                             |
| Menu Planner                                                        | X                         | X                   |                           |                             |                           |                                |                            |                                 |                          |                           |                       |                  |                        |                               |                     |                            | X                        |                             | 3                             |

BEHAVIOR CHANGE TECHNIQUE

| App name                                                   | 1.1 Goal setting (behav) | 1.4 Action planning | 2.3 Self-mon of behaviour | 3.1 Social support (unspec) | 3.2 Social support (prac) | 4.1 Instr on how perform behav | 5.1 Info about health cons | 5.3 Info about soc & envir cons | 5.6 Info about emot cons | 6.1 Demo of the behaviour | 6.2 Social comparison | 7.1 Prompts/cues | 8.2 Behav substitution | 10.1 Material incentive behav | 10.2 Material reward behav | 10.3 Non-specific reward | 10.6 Non-specific incentive | 12.5 Add objects to the envir | 14.1 Behaviour cost | No. of BCTs per app |
|------------------------------------------------------------|--------------------------|---------------------|---------------------------|-----------------------------|---------------------------|--------------------------------|----------------------------|---------------------------------|--------------------------|---------------------------|-----------------------|------------------|------------------------|-------------------------------|----------------------------|--------------------------|-----------------------------|-------------------------------|---------------------|---------------------|
| My family meal planner                                     |                          |                     |                           |                             |                           | X                              | X                          | X                               |                          |                           |                       |                  |                        |                               |                            |                          |                             | X                             |                     | 4                   |
| PlanBuyCook                                                | X                        | X                   |                           |                             |                           | X                              |                            |                                 |                          |                           |                       |                  |                        |                               |                            |                          |                             | X                             |                     | 4                   |
| Plateful                                                   | X                        | X                   |                           |                             |                           |                                |                            | X                               |                          |                           |                       |                  |                        |                               |                            |                          |                             | X                             |                     | 4                   |
| Recipe calendar                                            | X                        | X                   |                           | X                           |                           | X                              |                            | X                               |                          |                           |                       | X                |                        |                               |                            |                          |                             | X                             |                     | 7                   |
| Today's Parent Mealtime                                    | X                        | X                   |                           |                             |                           | X                              |                            |                                 |                          |                           |                       |                  |                        |                               |                            |                          |                             | X                             |                     | 4                   |
| Week menu                                                  | X                        | X                   |                           |                             |                           |                                |                            |                                 |                          |                           |                       |                  |                        |                               |                            |                          |                             | X                             |                     | 3                   |
| Mean (SD) no. of BCTs identified in meal planning apps:    |                          |                     |                           |                             |                           |                                |                            |                                 |                          |                           |                       |                  |                        |                               |                            |                          |                             |                               | 4.8 (1.9)           |                     |
| <b>Shopping list apps</b>                                  |                          |                     |                           |                             |                           |                                |                            |                                 |                          |                           |                       |                  |                        |                               |                            |                          |                             |                               |                     |                     |
| AnyList                                                    |                          |                     |                           |                             |                           | X                              |                            |                                 |                          |                           |                       |                  |                        |                               |                            |                          |                             | X                             |                     | 2                   |
| Grocery king                                               |                          |                     |                           |                             |                           |                                |                            |                                 |                          |                           |                       | X                |                        |                               |                            |                          |                             | X                             |                     | 2                   |
| Grocery List                                               |                          |                     |                           |                             |                           |                                |                            |                                 |                          |                           |                       |                  |                        |                               |                            |                          |                             | X                             |                     | 1                   |
| Grocery tracker                                            | X                        | X                   |                           |                             |                           |                                |                            |                                 |                          |                           |                       |                  |                        |                               |                            |                          |                             | X                             |                     | 3                   |
| H-E-B                                                      |                          |                     |                           |                             |                           | X                              |                            |                                 |                          |                           |                       |                  |                        | X                             |                            |                          |                             | X                             |                     | 3                   |
| Lister                                                     |                          |                     |                           |                             |                           |                                |                            |                                 |                          |                           |                       |                  |                        |                               |                            |                          |                             | X                             |                     | 1                   |
| Mighty shopping list                                       | X                        | X                   |                           |                             |                           |                                |                            |                                 |                          |                           |                       |                  |                        |                               |                            |                          |                             | X                             |                     | 3                   |
| Out of milk                                                |                          |                     |                           |                             |                           | X                              |                            |                                 |                          |                           |                       |                  |                        | X                             |                            |                          |                             | X                             |                     | 3                   |
| Scan2List                                                  |                          |                     |                           |                             |                           | X                              |                            |                                 |                          |                           |                       |                  |                        |                               |                            |                          |                             | X                             |                     | 2                   |
| Shopping List Ease                                         |                          |                     |                           |                             |                           |                                |                            |                                 |                          |                           |                       | X                | X                      |                               |                            |                          |                             | X                             |                     | 3                   |
| Mean (SD) no. of BCTs identified in shopping list apps:    |                          |                     |                           |                             |                           |                                |                            |                                 |                          |                           |                       |                  |                        |                               |                            |                          |                             |                               | 2.3 (0.8)           |                     |
| <b>Family organizer apps</b>                               |                          |                     |                           |                             |                           |                                |                            |                                 |                          |                           |                       |                  |                        |                               |                            |                          |                             |                               |                     |                     |
| Cozi                                                       | X                        | X                   |                           |                             | X                         | X                              |                            |                                 |                          |                           |                       |                  |                        |                               |                            |                          |                             | X                             |                     | 5                   |
| Organizer To-Do                                            | X                        | X                   |                           |                             |                           | X                              |                            |                                 |                          |                           |                       |                  |                        |                               |                            |                          |                             | X                             |                     | 4                   |
| OurHome                                                    | X                        | X                   | X                         | X                           |                           |                                |                            | X                               |                          |                           |                       | X                |                        |                               |                            | X                        | X                           | X                             | X                   | 10                  |
| Picnic                                                     |                          |                     |                           |                             | X                         | X                              |                            |                                 |                          |                           |                       |                  |                        |                               |                            |                          |                             | X                             |                     | 3                   |
| Mean (SD) no. of BCTs identified in family organizer apps: |                          |                     |                           |                             |                           |                                |                            |                                 |                          |                           |                       |                  |                        |                               |                            |                          |                             |                               | 5.5 (3.1)           |                     |
| <b>Food choice apps</b>                                    |                          |                     |                           |                             |                           |                                |                            |                                 |                          |                           |                       |                  |                        |                               |                            |                          |                             |                               |                     |                     |
| FoodSwitch                                                 |                          |                     |                           |                             |                           |                                |                            |                                 |                          |                           |                       |                  | X                      |                               |                            |                          |                             | X                             |                     | 2                   |
| Perfect produce                                            |                          |                     |                           |                             |                           | X                              | X                          |                                 |                          |                           |                       |                  |                        |                               |                            |                          |                             | X                             |                     | 3                   |
| No. of food choice apps incorporating BCT:                 |                          |                     |                           |                             |                           |                                |                            |                                 |                          |                           |                       |                  |                        |                               |                            |                          |                             |                               | 2.5 (0.7)           |                     |
| TOTAL no. of apps incorporating BCT:                       | 27                       | 24                  | 4                         | 8                           | 2                         | 33                             | 4                          | 9                               | 2                        | 11                        | 3                     | 9                | 1                      | 5                             | 1                          | 2                        | 1                           | 51                            | 1                   | 3.9 (1.9)           |
